1 *Effects of joint mobilization combined with acupuncture on pain,*  
2 *physical function, and depression in stroke patients with chronic*  
3 *neuropathic pain: a randomized controlled trial*

4  
5 Ji-Eun Lee<sup>1</sup>, Takayuki Akimoto<sup>2</sup>, Ho-Seong Lee<sup>1,3\*</sup>

6 <sup>1</sup>Department of Exercise and Medical Science, Graduate School, Dankook University,  
7 Cheonan, Republic of Korea

8 <sup>2</sup>Laboratory of Muscle Biology, Faculty of Sport Sciences, Waseda University,  
9 Tokorozawa, Japan

10 <sup>3</sup>Institute of Medical-Sports, Dankook University, Cheonan, Republic of Korea

11

12 \* Corresponding author

13 E-mail: [hoseh28@dankook.ac.kr](mailto:hoseh28@dankook.ac.kr) (HSL)

15

## 16 **Abstract**

17 Objective: To investigate the effectiveness of joint mobilization (JM) combined  
18 with acupuncture (AC) for treatment pain, physical function and depression in  
19 poststroke patients. Methods: A total of 69 poststroke patients were randomly  
20 assigned to the JM+AC group (n = 23), the JM group (n = 23), and the control group  
21 (n = 23). Patients in the JM+AC group and the JM group received JM for 30 minutes,  
22 twice a week for 12 weeks, and the JM+AC group received AC for 30 minutes  
23 separately once a week. The control group did not receive JM or AC. Pain (visual  
24 analog scale, shoulder pain and disability index, Western Ontario and McMaster  
25 universities osteoarthritis index), physical function (range of motion, 10-m walking  
26 speed test, functional gait assessment, manual function test, activities of daily living  
27 scale, instrumental activities of daily living scale), and depression (center for  
28 epidemiologic studies depression scale, Beck depression inventory) were assessed for  
29 each patient before and after the 12 weeks of intervention. Results: Pain and physical  
30 function were improved significantly in the JM+AC group compared with the JM and  
31 control groups. Physical function and depression were improved significantly in the  
32 JM+AC and JM groups compared with the control group. Conclusion: The treatment  
33 of JM combined with AC improved pain, depression, and physical function of  
34 poststroke patients with chronic neuropathic pain in this study. This valuable finding

35 provides empirical evidence for the designing therapeutic interventions and  
36 identifying potential therapeutic targets.

37 **Keywords:** acupuncture, joint mobilization, neuropathic pain, poststroke

38

## 39 **Introduction**

40 Stroke is one of global healthcare problems that is common, serious, and  
41 disabling. Motor recovery from stroke is frequently poor or insufficient, with only  
42 one-third of poststroke patients regaining dexterity within the first 6 months [1]. Less  
43 than 45% of stroke patients are likely to achieve complete functional recovery, and  
44 the majority of patients has some residual impairment and an inability to perform  
45 activities of daily living (ADL) [2-4]. In addition to motor control and sensory  
46 deficits, stroke survivors also develop complications such as pain, spasticity, joint  
47 constraint, skin or vascular damage, and chronic neuropathic pain caused by nerve  
48 damage, which are the main challenges in poststroke management [5,6].

49 Shoulder pain experienced by more than 50% of poststroke patients, is a  
50 common sequelae [7], interfering with rehabilitation and reducing arm function and  
51 ADL [8]. Knee pain is the second most common pain in patients after stroke, and it  
52 has been reported to cause motor dysfunction and abnormal gait [9]. The recovery of  
53 gait function is a primary goal of rehabilitation, with the majority of poststroke

54 patients suffering from a reduction in gait velocity and independent gait is crucial in  
55 carrying out ADL following stroke [10]. Additionally, sensorimotor dysfunction  
56 causes limited joint range of motion (ROM) and muscle weakness in the lower  
57 extremities of the affected side, leading to difficulties in performing functional  
58 activities, such as sit to stand and gait [11,12]. Therefore, it is necessary to reduce  
59 pain and increase the joint ROM to improve physical function in poststroke patients.  
60 To tackle these problems and to help restore and improve the function of upper and  
61 lower limbs, a wide range of treatments has been proposed to therapists, so far.

62 Mulligan first proposed mobilization-with-movement treatment as a joint  
63 mobilization (JM) technique [13]. JM is an orthopedic manipulation therapy used for  
64 its mechanical effects to relieve pain, improve mobility, and treat contractures via the  
65 third stage of the translatory movement and the convex–concave rule [14]. According  
66 to the convex–concave rule, gliding on a convex joint surface is performed in the  
67 opposite direction to the bone’s movement; gliding on a concave joint surface is  
68 performed in the same direction as the bone’s movement. When a concave joint  
69 surface is distracted, the joint is pulled along the long axis of the bone; alternatively,  
70 when a convex joint surface is distracted, the joint surface must be separated [14]. JM  
71 has the mechanical effect of disrupting the contracture by direct movement of the joint  
72 area, and the arthrokinetic reflex effect of suppressing or facilitating the related  
73 muscles is achieved by stimulating the joint receptors [15]. However, there appears to

74 be a limit to how JM alone can reduce pain and restore physical function in poststroke  
75 patients.

76 Acupuncture (AC) is commonly used to treat/manage chronic diseases in Korea  
77 [16]. It is recognized to be effective in regulating physiological balance by controlling  
78 muscles and acupuncture points or by stimulating the affected area [17]. And AC is  
79 effective in reducing pain by stimulating the nerves in stroke patients and help to  
80 restore motor function and improve the ADL score [18]. Studies suggest that AC is  
81 also effective in improving pain and depression in poststroke patients [19].  
82 Particularly, AC combined with other therapies is more effective in poststroke  
83 patients than AC alone [20]. Therefore, it is possible that AC combined with JM is  
84 more effective to improve pain, depression, and physical function in poststroke  
85 patients. Although there are many studies about effectiveness of JM for poststroke  
86 patients, a few studies have examined the effects of JM combined with AC for these  
87 patients.

88 In this work, we examined the changes in pain, physical function, and depression  
89 before and after the 12 weeks of intervention of JM combined with AC in poststroke  
90 patients. We hypothesized that combining JM with AC would improve physical  
91 function more compared with JM alone.

92

## 93 **Methods**

### 94 **1. Study design**

95 The study had a random sampling design. Participants were randomized  
96 electronically using block sizes of 3 across groups. All investigators and data analysts  
97 were blinded until the study and analysis were completed.

98 Written informed consent was obtained from all subjects and the signed informed  
99 consent documents were kept on file. The protocol was approved by the Dankook  
100 University ethics committee (IRB number: 2021-05-046) and it adhered to the tenets  
101 of the Declaration of Helsinki and its later amendments or comparable ethical  
102 standards. The individual in this manuscript has given written informed consent (as  
103 outlined in PLOS consent form) to publish these case details.

104 This clinical trial was registered with the Korean Clinical Research Information  
105 Service approved by the WHO. Registration number: KCT0007924. Date registered:  
106 22/11/2022, retrospectively registered. No dropouts or adverse events were reported.

### 107 **2. Participants**

108 This study included 69 adults who were diagnosed with stroke and were enrolled  
109 in a public health center and welfare center located in D city, South Korea. This group  
110 was further divided into the JM+AC, the JM, and the control groups (n = 23 each).

111 The inclusion criteria were: diagnosis of stroke  $\geq$  6 months ago; pain in the shoulders  
112 and knees for more than 6 months; and a Korean Mini Mental State Examination  
113 score of  $\geq$  24. The exclusion criteria were: a risk of tumors or infections; a previous  
114 history of orthopedic disease or ankle surgery; a previous history of orthopedic  
115 disease or shoulder and knee joint surgery; and a length of  $\geq$  6.3 mm in the line  
116 bisection test; taking medications for diseases other than stroke, such as antiplatelet  
117 drugs and anticoagulants. The demographics and clinical characteristics of the study  
118 patients were summarized at inclusion (Table 1). No significant differences in the  
119 pretraining status of the control and experimental groups were noted.

120 **Table 1. Participant characteristics.**

| <b>Variables</b>                  | <b>JM+AC (n=23)</b> | <b>JM (n=23)</b>  | <b>CON (n=23)</b> | <b>p</b> |
|-----------------------------------|---------------------|-------------------|-------------------|----------|
| <b>Age (years)</b>                | 73.78 $\pm$ 6.52    | 74.13 $\pm$ 5.63  | 76.74 $\pm$ 6.62  | 0.23     |
| <b>Sex (male/female)</b>          | 12 / 11             | 17 / 6            | 13 / 10           | 0.29     |
| <b>Affected side (right/left)</b> | 13 / 10             | 10 / 13           | 13 / 10           | 0.60     |
| <b>Onset time (month)</b>         | 52.57 $\pm$ 24.39   | 61.35 $\pm$ 21.00 | 61.09 $\pm$ 22.20 | 0.33     |
| <b>MMSE-K (score)</b>             | 26.17 $\pm$ 1.34    | 26.35 $\pm$ 1.44  | 25.87 $\pm$ 1.40  | 0.51     |

Values are means  $\pm$  standard deviation.

MMSE-K: Korean mini mental state examination.

### 121 **3. Interventions**

### 122 **3.1. Joint mobilization**

123 For 12 weeks, the JM+AC and JM groups received grades II and III JM for 30  
124 min, twice weekly, to relieve pain in the shoulder and knee joints and to improve the  
125 ROM [14]. Shoulder JM was performed on the glenohumeral joint and  
126 scapulothoracic joint in the supine and prone positions. Lateral distraction, downward  
127 glide, posterior glide, and anterior glide were performed on the glenohumeral joint.  
128 Elevation, depression, protraction, retraction, upward rotation, and downward rotation  
129 were performed on the scapulothoracic joint. Knee JM was performed on the  
130 tibiofemoral and patellofemoral joints in the supine and prone positions. Lower  
131 distraction, posterior glide, and anterior glide were performed on the tibiofemoral  
132 joint. Downward, lateral, and medial glides were performed on the patellofemoral  
133 joint.

### 134 **3.2 Acupuncture**

135 The JM+AC group received acupuncture and moxibustion treatments around the  
136 shoulder and the knee joints for 30 min, once a week for 12 weeks. Acupuncture  
137 treatment was performed using disposable sterile stainless-steel needles (0.20 × 30  
138 mm, Dongbang, Korea) for 15 min on average (figure 1). The penetration depth  
139 varied according to the site and was 20 mm deep on average. For moxibustion  
140 treatment, mini moxibustion (Taegeuk, Korea) was performed for 15 min (fig 1).

141 **Fig 1. Acupuncture and moxibustion treatment materials.**



142 Disposable sterile needles (left picture). Disposable mini moxa rolls (right picture).

## 143 **4. Outcome Measures**

### 144 **4.1 Pain**

145 Pain severity was measured using a visual analog scale (VAS), the shoulder pain  
146 and disability index (SPADI), and the Korean Western Ontario McMaster Universities  
147 osteoarthritis index (KWOMAC) before and after 12 weeks of the experimental  
148 period. The VAS used a 100-mm line on which a pain-free state was 0 and severe pain  
149 was 100, and the reliability is 0.99 [21]. SPADI is an evaluation tool for assessing the  
150 degree of shoulder pain and disability that comprises 13 evaluation items scored on a  
151 scale of 0–10 [22]. A score above 100 (out of 130) indicates more shoulder pain and  
152 disability. The reliability is 0.94 [23]. KWOMAC, a Korean version of WOMAC  
153 [24], is an evaluation tool for assessing the degree of knee pain and function [25]. It  
154 consists of 24 evaluation items scored on a scale of 0–4 points and a total score of 96  
155 points. Higher scores indicate a worse knee condition. The reliability is 0.96 [25].

### 156 **4.2 Physical function**

157 The range of motion (ROM), 10-meter walk test (10-MWT), functional gait  
158 assessment (FGA), manual function test (MFT) for measuring physical function,  
159 ADL, and instrumental ADL (IADL) were evaluated before and after 12 weeks of the  
160 experimental period.

161 A goniometer (Saehan Corporation, Korea) was used to measure the ROM of the  
162 shoulder and knee joint. Active ROM for shoulder flexion (SF), shoulder extension  
163 (SE), shoulder abduction (SAB), shoulder adduction (SAD), and knee flexion (KF)  
164 were measured. The measurement was performed three times, and the average value  
165 was used. The reliability is 0.89 [26].

166 The 10-MWT requires the participant to walk independently over the middle 10  
167 m portion on a 14-m path; the time is measured in seconds and the test is repeated  
168 three times. The reliability is 0.99 [27].

169 FGA was developed by Wrisley et al. [28] to evaluate gait and comprises 10  
170 items scored on a scale of 0–3 points and a total score of 30 points. Specific items  
171 include walking on level surfaces, changing walking speed, turning the head to the  
172 side while walking, moving the head up and down while walking, walking with one  
173 foot as an axis, walking around obstacles, gait with a narrow base of support, walking  
174 with eyes closed, walking backward, and climbing stairs. The reliability is 0.93 [28].

175 MFT is a test tool developed to assess the overall condition of arm function in a  
176 stroke patient. It consists of eight items, and if subitem inspection is possible, it is  
177 measured as 1 point. The reliability is 0.95 [29].

178 ADL and IADL are tools developed by Won et al. [30] ADL comprising seven  
179 items covering dressing, washing the face, bathing, eating, moving, using the toilet,

180 and controlling the bladder, with a total of 21 points. IADL comprises 30 items scored  
181 on a scale of 1–3. Ten items cover grooming, chores, preparing meals, washing  
182 clothes, going out a short distance, using transport, buying goods, managing money,  
183 using a phone, and taking medicine. Higher scores indicate lower dependence in  
184 evaluating the independence level in ADL. The reliability is 0.93 [30].

### 185 **4.3 Depression**

186 Depression was measured using the center for epidemiologic studies depression  
187 scale (CES-D) and the Beck depression inventory (BDI) before and after 12 weeks of  
188 the experimental period.

189 CES-D is a self-reported depression evaluation tool [31], comprising 20  
190 evaluation items scored on a scale of 0–3 points. Scores higher than 21 (out of 60)  
191 indicate a higher frequency of depressive experiences. The reliability is 0.90 [31].

192 BDI is a tool for evaluating emotional, cognitive, motivational, and physiological  
193 depression, and the Korean version was used [32]. It comprises 21 evaluation items  
194 scored on a scale of 0–3 points and a total score of 63 points. The reliability is 0.84  
195 [32].

## 196 **5. Statistical Analysis**

197 The data were analyzed statistically using SPSS 23.0 software (SPSS, Chicago,  
198 IL, USA). General characteristics prior to the interventions were analyzed using

199 descriptive statistics. Two-way analysis of variance (2-way ANOVA) with repeated  
200 measures was performed to verify the difference between groups and time periods.  
201 Multiple comparisons were performed according to the post hoc test (Tukey HSD)  
202 when there was a significant difference between groups and time periods. A paired t  
203 test was used to compare variations in pain, physical function, and depression before  
204 and after experimental period for each group. Statistical significance was reached  
205 when  $p < 0.05$ .

206

## 207 **Results**

### 208 **1. Pain**

209 The changes in pain severity are shown in Table 2. The VAS was not statistically  
210 significant between groups, but SPADI decreased significantly in the JM+AC group  
211 compared to the JM group and the control group ( $p < 0.05$ ), and KWOMAC  
212 decreased significantly in the JM+AC group compared to the control group ( $p < 0.05$ ).  
213 The VAS, SPADI, and KWOMAC were decreased significantly in the JM+AC and  
214 JM groups after 12 weeks of intervention ( $p < 0.05$ ).

215 **Table 2. Pain before and after joint mobilization and joint mobilization**

216 **combined with acupuncture.**

| Variables       | JM+AC (n=23) |         |       | JM (n=23) |         |       | CON (n=23) |         |       | F     | ES   |
|-----------------|--------------|---------|-------|-----------|---------|-------|------------|---------|-------|-------|------|
|                 | pre          | post    | t     | pre       | post    | t     | pre        | post    | t     |       |      |
|                 | 75.65 ±      | 56.13 ± | 5.18* | 63.48 ±   | 56.30 ± | 2.32* | 62.83      | 67.17 ± | -1.50 | 0.97  | 0.28 |
| <b>VAS (mm)</b> | 18.55        | 5.80    |       | 3.45      | 4.35    |       | ±          | 18.52   |       |       |      |
|                 |              |         |       |           |         |       |            | 14.99   |       |       |      |
| <b>SPADI</b>    | 68.90 ±      | 63.71 ± | 6.11* | 58.16 ±   | 56.79 ± | 3.32* | 58.56      | 58.86 ± | -1.31 | 4.78* | 0.13 |
| <b>(score)</b>  | 0.12         | 8.40†‡  |       | 11.92     | 11.98   |       | ±          | 10.27   |       |       |      |
|                 |              |         |       |           |         |       |            | 10.32   |       |       |      |
| <b>KWOMAC</b>   | 73.40 ±      | 51.88 ± | 5.93* | 68.65 ±   | 59.57 ± | 3.07* | 68.61      | 71.43 ± | -1.70 | 3.32* | 0.09 |
| <b>(score)</b>  | 5.22         | 12.46†  |       | 11.95     | 9.80    |       | ±          | 12.87   |       |       |      |
|                 |              |         |       |           |         |       |            | 11.40   |       |       |      |

Values are means ± standard deviation.

VAS: visual analog scale, SPADI: shoulder pain and disability index, KWOMAC: Korean Western

Ontario and McMaster universities osteoarthritis index.

\*p < 0.05 vs. pre-exercise. †p < 0.05 vs. CON. ‡p < 0.05 vs. JM.

217 **2. Physical function**

218 The changes in physical functions are shown in Table 3.

219 **Table 3. Physical function before and after joint mobilization and joint**

220 **mobilization combined with acupuncture.**

| Variables      |         | JM+AC (n=23) |        |         | JM (n=23) |        |        | CON (n=23) |      |       | F    | ES |
|----------------|---------|--------------|--------|---------|-----------|--------|--------|------------|------|-------|------|----|
| Period         | pre     | post         | t      | pre     | post      | t      | pre    | post       | t    |       |      |    |
|                | 119.91  | 125.26       | -4.74* | 128.17  | 129.17    | -1.17  | 128.6  | 124.48     | 4.18 | 1.12  | 0.03 |    |
| <b>SF</b>      | ± 14.00 | ± 13.26      |        | ± 14.46 | ± 13.21   |        | 5 ±    | ± 3.30     |      |       |      |    |
|                |         |              |        |         |           |        | 3.02   |            |      |       |      |    |
| <b>SE</b>      | 33.70 ± | 38.96 ±      | -5.79* | 37.52 ± | 37.83 ±   | -0.36  | 34.48  | 32.39 ±    | 2.36 | 2.03  | 0.06 |    |
|                | 8.13    | 6.64         |        | 8.63    | 1.40      |        | ± 1.76 | 1.40       |      |       |      |    |
| <b>SAB</b>     | 109.13  | 114.70       | -6.26* | 117.44  | 118.52    | -1.38  | 112.2  | 110.22     | 2.26 | 2.56  | 0.07 |    |
| <b>ROM</b>     | ± 11.93 | ± 10.17      |        | ± 2.46  | ± 2.02    |        | 1 ±    | ± 2.64     |      |       |      |    |
| (°)            |         |              |        |         |           |        | 2.41   |            |      |       |      |    |
| <b>SAD</b>     | 40.83 ± | 47.65 ±      | -7.13* | 39.91 ± | 42.39 ±   | -1.89  | 41.96  | 40.00 ±    | 2.20 | 2.28  | 0.07 |    |
| (°)            | 6.34    | 6.77         |        | 1.64    | 1.47      |        | ± 1.10 | 0.89       |      |       |      |    |
| <b>KF</b>      | 117.31  | 127.17       | -5.49* | 119.91  | 125.65    | -4.37* | 112.8  | 112.39     | 0.44 | 7.27* | 0.18 |    |
|                | ± 11.68 | ± 8.71†      |        | ± 2.02  | ± 1.70†   |        | 3 ±    | ± 2.65     |      |       |      |    |
| (°)            |         |              |        |         |           |        | 2.61   |            |      |       |      |    |
| <b>10-M</b>    | 25.83 ± | 14.81 ±      | 7.44*  | 23.23 ± | 18.13 ±   | 4.97*  | 24.55  | 24.04 ±    | 0.98 | 1.54  | 0.45 |    |
| <b>GAIT WT</b> | 11.49   | 8.45         |        | 6.23    | 6.49      |        | ± 9.58 | 9.92       |      |       |      |    |
| (s)            |         |              |        |         |           |        |        |            |      |       |      |    |

|                   |                        |                        |       |              |        |      |
|-------------------|------------------------|------------------------|-------|--------------|--------|------|
| <b>FGA</b>        | 18.78 ± 23.13 ± -5.90* | 19.04 ± 22.00 ± -4.22* | 20.04 | 19.74 ± 0.79 | 0.75   | 0.22 |
| <b>(score</b>     | 3.28                   | 2.70                   | 3.04  | 2.70         | ± 3.83 | 4.17 |
| )                 |                        |                        |       |              |        |      |
| <b>MFT</b>        | 20.78 ± 22.91 ± -6.16* | 20.43 ± 21.52 ± -4.64* | 20.00 | 19.52 ± 1.85 | 11.65  | 0.26 |
| <b>(score</b>     | 1.57                   | 1.73†‡                 | 1.41  | 1.62†        | ± 1.71 | 1.68 |
| )                 |                        |                        |       |              |        | *    |
| <b>ADL</b>        | 17.57 ± 20.22 ± -5.42* | 17.13 ± 19.30 ± -7.61* | 16.65 | 16.57 ± 0.33 | 13.93  | 0.30 |
| <b>ADL (score</b> | 0.52                   | 1.88†                  | 0.39  | 0.19†        | ± 0.36 | 0.40 |
| )                 |                        |                        |       |              |        | *    |
| <b>IADL</b>       | 24.35 ± 26.96 ± -1.13* | 23.13 ± 23.57 ± -0.93  | 22.96 | 22.70 ± 1.03 | 4.77*  | 0.13 |
| <b>(score</b>     | 0.90                   | 0.39†‡                 | 0.81  | 0.72         | ± 0.80 | 0.70 |
| )                 |                        |                        |       |              |        |      |

---

Values are means ± standard deviation.

ROM: range of motion, SF: shoulder flexion, SE: shoulder extension, SAB: shoulder abduction, SAD: shoulder adduction, KF: knee flexion, KE: knee extension, 10-MWT: 10-meter walking speed test, FGA: functional gait assessment, MFT: manual function test, ADL: activities of daily living scale, IADL: instrumental activities of daily living scale.

\*p < 0.05 vs. pre-exercise. †p < 0.05 vs. CON. ‡p < 0.05 vs. JM.

222 SF, SE, SAB, and SAD were not statistically significant between groups, but KF  
223 increased significantly in the JM+AC and JM groups compared to the control group  
224 ( $p < 0.05$ ). Within the JM+AC group, SF, SE, SAB, and SAD increased significantly  
225 ( $p < 0.05$ ), whereas KF increased significantly in the JM+AC and JM groups after 12  
226 weeks of intervention ( $p < 0.05$ ).

## 227 **2.2 Gait**

228 The 10-MWT and FGA were not statistically significant between groups, but  
229 10-MWT and FGA improved significantly in the JM+AC and JM groups after 12  
230 weeks of intervention ( $p < 0.05$ ).

## 231 **2.3 Activities of daily living**

232 MFT increased significantly in the JM+AC group compared to the JM group and  
233 control groups ( $p < 0.05$ ), as well as in the JM group compared to the control group ( $p$   
234  $< 0.05$ ). ADL increased significantly in the JM+AC and JM groups compared to the  
235 control group ( $p < 0.05$ ), and IADL increased significantly in the JM+AC group  
236 compared to the JM group and the control group ( $p < 0.05$ ). Within the JM+AC and  
237 JM groups, MFT and ADL increased significantly ( $p < 0.05$ ), whereas IADL  
238 increased significantly in the JM+AC group after 12 weeks of intervention ( $p < 0.05$ ).

## 239 **3. Depression**



240 The changes in depression are shown in Table 4. CES-D and BDI decreased  
 241 significantly in the JM+AC and JM groups compared to the control group ( $p < 0.05$ ),  
 242 and CES-D and BDI decreased significantly in the JM+AC group after 12 weeks of  
 243 intervention ( $p < 0.05$ ).

244 **Table 4. Depression before and after joint mobilization and joint mobilization**  
 245 **combined with acupuncture.**

| Variables          | JM+AC (n=23)  |               |       | JM (n=23)     |               |      | CON (n=23)   |              |       | F     | ES   |
|--------------------|---------------|---------------|-------|---------------|---------------|------|--------------|--------------|-------|-------|------|
|                    | pre           | post          | t     | pre           | post          | t    | pre          | post         | t     |       |      |
| <b>CES-D</b>       | 26.83 ± 8.63  | 20.30 ± 8.87† | 5.24* | 20.48 ± 9.57  | 20.43 ± 8.88  | 0.06 | 27.91 ± 8.96 | 33.00 ± 8.77 | -3.60 | 7.11* | 0.18 |
| <b>BDI (score)</b> | 32.48 ± 11.04 | 22.35 ± 7.97† | 5.49* | 30.61 ± 12.23 | 29.96 ± 10.99 | 1.19 | 33.70 ± 9.49 | 39.43 ± 9.15 | -3.33 | 5.97* | 0.15 |

Values are means ± standard deviation.

CES-D: center for epidemiologic studies depression scale, BDI: Beck depression inventory.

\* $p < 0.05$  vs. pre-exercise. † $p < 0.05$  vs. CON. ‡ $p < 0.05$  vs. JM.

246

## 247 **Discussion**

248       The main finding of this study was that JM combined with AC treatment  
249 improved the subjective pain, depression, and physical function of poststroke patients  
250 more effectively than JM alone.

251       Shoulder and knee pain impedes rehabilitation and interferes with daily activities  
252 in poststroke patients [7–9]. Kaltenborn et al. [14] indicated that JM was effective in  
253 relieves shoulder and knee pain through direct movement of the joints. In AC  
254 treatments, acupuncture treatment is reported to increase pain threshold by stimulating  
255 the central nervous system, and moxibustion treatment has an analgesic effect through  
256 thermal stimulation [18,33]. Additionally, previous studies reported that AC treatment  
257 reduced SPADI and KOMAC [34,35]. Taken together, it was confirmed that JM  
258 combined with AC treatment had a more positive effect on pain in poststroke patients  
259 than JM alone.

260       Kluding and Santos [36] stated that the JM technique improved movement  
261 without changing in joint ROM. Alternatively, Choi et al. [37] reported that AC  
262 treatment reduces pain and increases joint flexibility by regenerating the surrounding  
263 soft tissue. We found that there was a significant difference in ROM before and after  
264 the intervention in the JM+ AC group, but not in the JM group in this study. These  
265 results may imply that it is difficult to improve joint ROM with JM alone.

266 As mentioned in the introduction, gait is an important factor for independent  
267 living and social participation. JM showed a positive effect on gait by improving  
268 active ROM which is the ROM that can be achieved by patient himself/herself [38],  
269 and AC treatment stimulated muscles and nerves to improve gait [39]. Additionally,  
270 previous studies stated that acupuncture had a beneficial impact on the energy  
271 production of joints during walking [40]. In this study, gait was significantly  
272 improved after the intervention in the JM+ AC and JM groups, but there was no  
273 difference between groups. Generally, gait necessitates movement of hip, knee, and  
274 ankle joints. The lower extremity interventions in this study were limited to the knee  
275 joint, which may not have been sufficient to influence group effect comparisons. In  
276 the future, it would be prudent to intervene in all joints of lower extremity.

277 We employed several measurements to assess physical function, which is  
278 important for daily living. MFT is an assessment of overall arm function [29], SPADI  
279 is for shoulder pain and disability [22]. IADL is for evaluation of dressing, toilet  
280 using, and movement [30]. It is thought that the reduction of SPADI restored arm  
281 function in poststroke patients and affected MFT and IADL. Previous research has  
282 shown that acupuncture has little effect on improving the lifestyle of stroke patients  
283 [41], but it is believed that it had a positive effect on IADL in this study because joint  
284 mobilization was combined with acupuncture. Arm function and daily life activities of  
285 the patients in the JM+ AC group might be improved through the increase in muscle  
286 activity induced by JM and the recovery of neurological damage by AC treatment.

287 Depression is associated with pain in poststroke patients [7], and depression in  
288 these patients are associated with mortality, suicide risk, and quality of life [42–44].  
289 Thus, depression must be verified in rehabilitation process for functional recovery  
290 after stroke, in general. The CES-D and BDI scores in the JM+ AC group were  
291 significantly decreased after 12 weeks of the intervention, but not in the JM group.  
292 This is most likely due to AC treatment to alleviate pain and improve ADL. A  
293 previous study showed that JM improved depression by reducing stress factors  
294 through improvement of unstable posture [45]. Furthermore, it has been reported that  
295 acupuncture treatment was effective in suppressing changes in the autonomic nervous  
296 system caused by mental stress [46]. It has also been reported that moxibustion  
297 treatment relaxed and stabilized the body through its thermal action [18]. Thus, it is  
298 considered that acupuncture and moxibustion treatment of AC reduced depression  
299 through autonomic nerve inhibition and thermal stimulation.

## 300 **Limitation**

301 There are several limitations in our study. The major part of subjects in this study  
302 was older farmers living in rural areas, and it is not uncertain whether the results of  
303 this study can be applied to other elderly population living in urban areas.  
304 Additionally, it might be better if we assessed the effect of the treatment more  
305 frequently because the results of this study were obtained before and after the 12  
306 weeks of intervention period.

307

## 308 **Conclusion**

309       Improvements in pain, depression, and physical function of poststroke patients in  
310 the JM+ AC group were significantly greater than those in the JM and the control  
311 groups, suggesting JM combined with AC was more effective in improving not only  
312 pain but also the ability to physical function. JM combined with AC may also be  
313 helpful for poststroke patients who have depression and decreased physical function  
314 due to chronic neuropathic pain. Future studies should reveal the physiological  
315 assessment of muscle strength and the effect of JM combined with AC on muscle tone  
316 based on changes in physical function in stroke patients with chronic neuropathic  
317 pain.

318

## 319 **Author Contributions**

320 Conceived and designed the experiments: JEL. Performed the experiments: JEL.  
321 Analyzed the data: JEL, TA. Wrote the paper: JEL, TA. Revised paper: TA, HSL.

322

## 323 **Conflicts of Interest**

324 The authors declare that there are no conflicts of interest regarding the publication of  
325 this paper.

326

## 327 **Acknowledgments**

328 We appreciate Kim Yeon-oh and Choi Jong-bin of the Dangjin City Public Health  
329 Center for their assistance with this experiment.

330

## 331 **Data Availability Statement**

332 Access to data was prepared using the following data set and is available at the free,  
333 public repository Figshare (<https://doi.org/10.6084/m9.figshare.21789092>).

334

## 335 **Funding**

336 This research did not receive any specific grant from funding agencies in the public,  
337 commercial, or not-for-profit sectors.

338

## 339 **References**

- 340 1. Dobkin BH. Rehabilitation after stroke. *N Engl J Med*. 2005;352(16):1677–84.
- 341 2. Flynn RW V, MacWalter RSM, Doney ASF. The cost of cerebral ischaemia.  
342 *Neuropharmacology*. 2008;55(3):250–6.
- 343 3. Kelly-Hayes M, Beiser A, Kase CS, Scaramucci A, D’Agostino RB, Wolf PA.  
344 The influence of gender and age on disability following ischemic stroke: the  
345 Framingham study. *J Stroke Cerebrovasc Dis*. 2003;12(3):119–26.
- 346 4. Marini C, Baldassarre M, Russo T, De Santis F, Sacco S, Ciancarelli I, et al.  
347 Burden of first-ever ischemic stroke in the oldest old: evidence from a  
348 population-based study. *Neurology*. 2004;62(1):77–81.
- 349 5. De Ryck A, Brouns R, Franssen E, Geurden M, Van Gestel G, Wilssens I, et al. A  
350 prospective study on the prevalence and risk factors of poststroke depression.  
351 *Cerebrovasc Dis Extra*. 2013 Jan;3(1):1–13.
- 352 6. Vér C, Hofgárt G, Menyhárt L, Kardos L, Csiba L. Ankle-foot continuous  
353 passive motion device for mobilization of acute stroke patients. *Open J Ther*  
354 *Rehabil*. 2015;3(02):23.
- 355 7. Klit H, Finnerup NB, Overvad K, Andersen G, Jensen TS. Pain Following  
356 Stroke: A Population-Based Follow-Up Study. *PLoS One*. 2011 Nov  
357 15;6(11):e27607.

- 358 8. Rand D. Proprioception deficits in chronic stroke—Upper extremity function  
359 and daily living. *PLoS One*. 2018 Mar 30;13(3):e0195043.
- 360 9. Caglar NS, Akin T, Aytakin E, Komut EA, Ustabasioglu F, Okur S, et al. Pain  
361 syndromes in hemiplegic patients and their effects on rehabilitation results. *J*  
362 *Phys Ther Sci*. 2016 Mar;28(3):731–7.
- 363 10. Yoo C, Yong M hyun, Chung J, Yang Y. Effect of computerized cognitive  
364 rehabilitation program on cognitive function and activities of living in stroke  
365 patients. *J Phys Ther Sci*. 2015;27(8):2487–9.
- 366 11. Fujita T, Iwata M, Fukuda M, Ikeda M. Relationship between lower extremity  
367 muscle mass, leg extension strength and muscle power of hemiplegic stroke  
368 patients. *J Phys Ther Sci*. 2011;23(2):277–82.
- 369 12. Lin PY, Yang YR, Cheng SJ, Wang RY. The relation between ankle  
370 impairments and gait velocity and symmetry in people with stroke. *Arch Phys*  
371 *Med Rehabil*. 2006;87(4):562–8.
- 372 13. Mulligan BR. Mobilisations with movement (MWMS) for the hip joint to restore  
373 internal rotation and flexion. *J Man Manip Ther*. 1996;4(1):35–6.
- 374 14. Kaltenborn FM, Evjenth O. Manual Mobilization of the Joints: The Kaltenborn  
375 Method of Joint Examination and Treatment. Vol 1. spine 5th ed Oslo Norli.  
376 2009;



- 377 15. Ersoy U, Kocak UZ, Unuvar E, Unver B. The Acute Effect of Talocrural Joint  
378 Mobilization on Dorsiflexor Muscle Strength in Healthy Individuals: A  
379 Randomized Controlled Single-Blind Study. *J Sport Rehabil.* 2019;28(6):601–5.
- 380 16. Kim JH, Kismali G, Gupta SC. Natural Products for the Prevention and  
381 Treatment of Chronic Inflammatory Diseases: Integrating Traditional Medicine  
382 into Modern Chronic Diseases Care. *Evidence-Based Complement Altern Med.*  
383 2018;2018:9837863.
- 384 17. Yang A, Wu HM, Tang J, Xu L, Yang M, Liu GJ. Acupuncture for stroke  
385 rehabilitation. *Cochrane Database Syst Rev.* 2016;(8).
- 386 18. Zuo CY, Lv P, Zhang CS, Lei RX, Zhou W, Wu QF, et al. Ipsi- and Contralateral  
387 Moxibustion Generate Similar Analgesic Effect on Inflammatory Pain. *Olajide*  
388 *OA, editor. Evidence-Based Complement Altern Med.* 2019;2019:1807287.
- 389 19. Lee JA, Park SW, Hwang PW, Lim SM, Kook S, Choi KI, et al. Acupuncture for  
390 shoulder pain after stroke: a systematic review. *J Altern Complement Med.* 2012  
391 Sep;18(9):818–23.
- 392 20. Heo KH, Hwang EH, Cho HW, Lee I, Hong JW, Shin YI, et al. An analysis of  
393 the effectiveness of stroke between east-west integrative medicine hospital and  
394 western medicine hospital by the data of brain rehabilitation registry. *J Korean*  
395 *Med Rehabil.* 2013;23(3):117–24.

- 396 21. Wagner DR, Tatsugawa K, Parker D, Young TA. Reliability and utility of a  
397 visual analog scale for the assessment of acute mountain sickness. *High Alt Med*  
398 *Biol.* 2007;8(1):27–31.
- 399 22. Roach KE, Budiman-Mak E, Songsiridej N, Lertratanakul Y. Development of a  
400 shoulder pain and disability index. *Arthritis Rheum Off J Am Coll Rheumatol.*  
401 1991;4(4):143–9.
- 402 23. Angst F, Goldhahn J, Pap G, Mannion AF, Roach KE, Siebertz D, et al.  
403 Cross-cultural adaptation, reliability and validity of the German Shoulder Pain  
404 and Disability Index (SPADI). *Rheumatology.* 2007;46(1):87–92.
- 405 24. Bellamy N. WOMAC Osteoarthritis Index: User Guide IV. WOMAC.  
406 Queensland, Aust. 2000;
- 407 25. Bae SC, Lee HS, Yun HR, Kim TH, Yoo DH, Kim SY. Cross-cultural adaptation  
408 and validation of Korean Western Ontario and McMaster Universities  
409 (WOMAC) and Lequesne osteoarthritis indices for clinical research. *Osteoarthr*  
410 *Cartil.* 2001;9(8):746–50.
- 411 26. Riddle, D. L., Rothstein, J. M., Lamb RL. Goniometric reliability in a clinical  
412 setting: shoulder measurements. *Phys Ther.* 67(5):668–73.
- 413 27. Steffen TM, Hacker TA, Mollinger L. Age- and Gender-Related Test  
414 Performance in Community-Dwelling Elderly People: Six-Minute Walk Test,

- 415 Berg Balance Scale, Timed Up & Go Test, and Gait Speeds. *Phys Ther.*  
416 2002 Feb 1;82(2):128–37.
- 417 28. Wrisley DM, Marchetti GF, Kuharsky DK, Whitney SL. Reliability, internal  
418 consistency, and validity of data obtained with the functional gait assessment.  
419 *Phys Ther.* 2004;84(10):906–18.
- 420 29. Miyamoto S, Kondo T, Suzukamo Y, Michimata A, Izumi SI. Reliability and  
421 validity of the Manual Function Test in patients with stroke. *Am J Phys Med*  
422 *Rehabil.* 2009;88(3):247–55.
- 423 30. Chang-Won WON, Keum-Yeol Y, Yong-Gyun RHO, Soo-Young KIM,  
424 Kyung-Hwan CHO, Ho-Cheol S, et al. The development of Korean activities of  
425 daily living (K-ADL) and Korean instrumental activities of daily living  
426 (K-IADL) scale. *J Korean Geriatr Soc.* 2002;107–20.
- 427 31. Radloff LS. The CES-D scale: A self-report depression scale for research in the  
428 general population. *Appl Psychol Meas.* 1977;1(3):385–401.
- 429 32. Beck AT, Ward CH, Mendelson M, Mock J, Erbaugh J. An inventory for  
430 measuring depression. *Arch Gen Psychiatry.* 1961;4(6):561–71.
- 431 33. Lee JD, Chon JS, Jeong HK, Kim HJ, Yun M, Kim DY, et al. The  
432 cerebrovascular response to traditional acupuncture after stroke. *Neuroradiology.*  
433 2003;45(11):780–4.

- 434 34. Dyson-Hudson TA, Shiflett SC, Kirshblum SC, Bowen JE, Druin EL.  
435 Acupuncture and Trager psychophysical integration in the treatment of  
436 wheelchair user's shoulder pain in individuals with spinal cord injury. Arch Phys  
437 Med Rehabil. 2001;82(8):1038–46.
- 438 35. Lo MY, Wu CH, Luh JJ, Wang TG, Fu LC, Lin JG, et al. The effect of  
439 electroacupuncture merged with rehabilitation for frozen shoulder syndrome: A  
440 single-blind randomized sham-acupuncture controlled study. J Formos Med  
441 Assoc. 2020;119(1, Part 1):81–8.
- 442 36. Kluding PM, Santos M. Effects of ankle joint mobilizations in adults poststroke:  
443 a pilot study. Arch Phys Med Rehabil. 2008 Mar;89(3):449–56.
- 444 37. Choi G cheol, Lee J won, Bae JE, Kim D jin, Hong J su, Kyung D hyun. The  
445 Clinical Effect of Complex Korean Medical Admission Treatment in Patients  
446 with Fractures of Distal Radius by Traffic Accident: 2 Cases Series Report. J  
447 Korean Med Rehabil. 2021;31(1):187–93.
- 448 38. Ravichandran H, Janakiraman B. The Effects of Ankle Joint Mobilization on  
449 Dorsiflexion Range and Gait Parameters in Chronic Stroke Survivors: A  
450 Systematic Review and Meta-analysis. J Stroke Med. 2021;4(1):15–24.
- 451 39. Kim MS, Moon BS. Effect of comprehensive Korean medicine with  
452 rehabilitation in stroke patients: a retrospective study. J Physiol Pathol Korean  
453 Med. 2016;30(5):355–9.

- 454 40. Hauer K, Wendt I, Schwenk M, Rohr C, Oster P, Greten J. Stimulation of  
455 acupoint ST-34 acutely improves gait performance in geriatric patients during  
456 rehabilitation: a randomized controlled trial. *Arch Phys Med Rehabil.*  
457 2011;92(1):7–14.
- 458 41. Sibbritt D, Peng W, Lauche R, Ferguson C, Frawley J, Adams J. Efficacy of  
459 acupuncture for lifestyle risk factors for stroke: A systematic review. *PLoS One.*  
460 2018;13(10):e0206288.
- 461 42. Kellermann M, Berecz R, Bereczki D. Does the severity of depressive symptoms  
462 after stroke affect long-term survival? An 18-year follow-up. *PLoS One.*  
463 2018;13(12):e0209157.
- 464 43. Wilkins SS, Akhtar N, Salam A, Bourke P, Joseph S, Santos M, et al. Acute post  
465 stroke depression at a Primary Stroke Center in the Middle East. *PLoS One.*  
466 2018;13(12):e0208708.
- 467 44. Kang SW, Lee SH, Lee YS, Kwon S, Bosch P, Lee YJ, et al. Association  
468 between depression and quality of life in stroke patients: The Korea National  
469 Health and Nutrition Examination Survey (KNHANES) IV–VII (2008–2018).  
470 *PLoS One.* 2022;17(6):e0269010.
- 471 45. Park D, Lee E, Lee K. Effects of Thoracic Flexibility Exercise Program on Pain,  
472 Heart Rate Variability, and Depression in Patients with Chronic Low Back Pain.  
473 *J Korean Soc Integr Med.* 2019;7(4):161–70.

- 474 46. Cho SY, Ha SY, Jang JY, Nam SS, Kim YS. Original Article: Effect of  
475 Hwangryunhaedoktang Pharmacopuncture at CV17 (Jeonjung) for Mental  
476 Stress on Short-term Analysis of Heart Rate Variability. J Korean Acupunct  
477 Moxibustion Soc. 2009;26(5):50.

479

## 480 **Supporting Information**

481 **S1 Fig. Acupuncture and moxibustion treatment materials.** Disposable sterile  
482 needles (left picture). Disposable mini moxa rolls (right picture).

483 **S1 Table. Participant characteristics.** MMSE-K: Korean mini mental state  
484 examination.

485 **S2 Table. Pain before and after joint mobilization and joint mobilization**  
486 **combined with acupuncture.** VAS: visual analog scale, SPADI: shoulder pain and  
487 disability index, KWOMAC: Korean Western Ontario and McMaster universities  
488 osteoarthritis index.

489 **S3 Table. Physical function before and after joint mobilization and joint**  
490 **mobilization combined with acupuncture.** ROM: range of motion, SF: shoulder  
491 flexion, SE: shoulder extension, SAB: shoulder abduction, SAD: shoulder adduction,  
492 KF: knee flexion, KE: knee extension, 10-MWT: 10-meter walking speed test, FGA:  
493 functional gait assessment, MFT: manual function test, ADL: activities of daily living  
494 scale, IADL: instrumental activities of daily living scale.

495 **S4 Table. Depression before and after joint mobilization and joint mobilization**  
496 **combined with acupuncture.** CES-D: center for epidemiologic studies depression  
497 scale, BDI: Beck depression inventory.

498

499 **S1 Checklist. CONSORT Checklist.** Checklist of information to include when

500 reporting a randomized trial.

501 **S2 Checklist. CONSORT Flow Diagram.** Flow diagram.



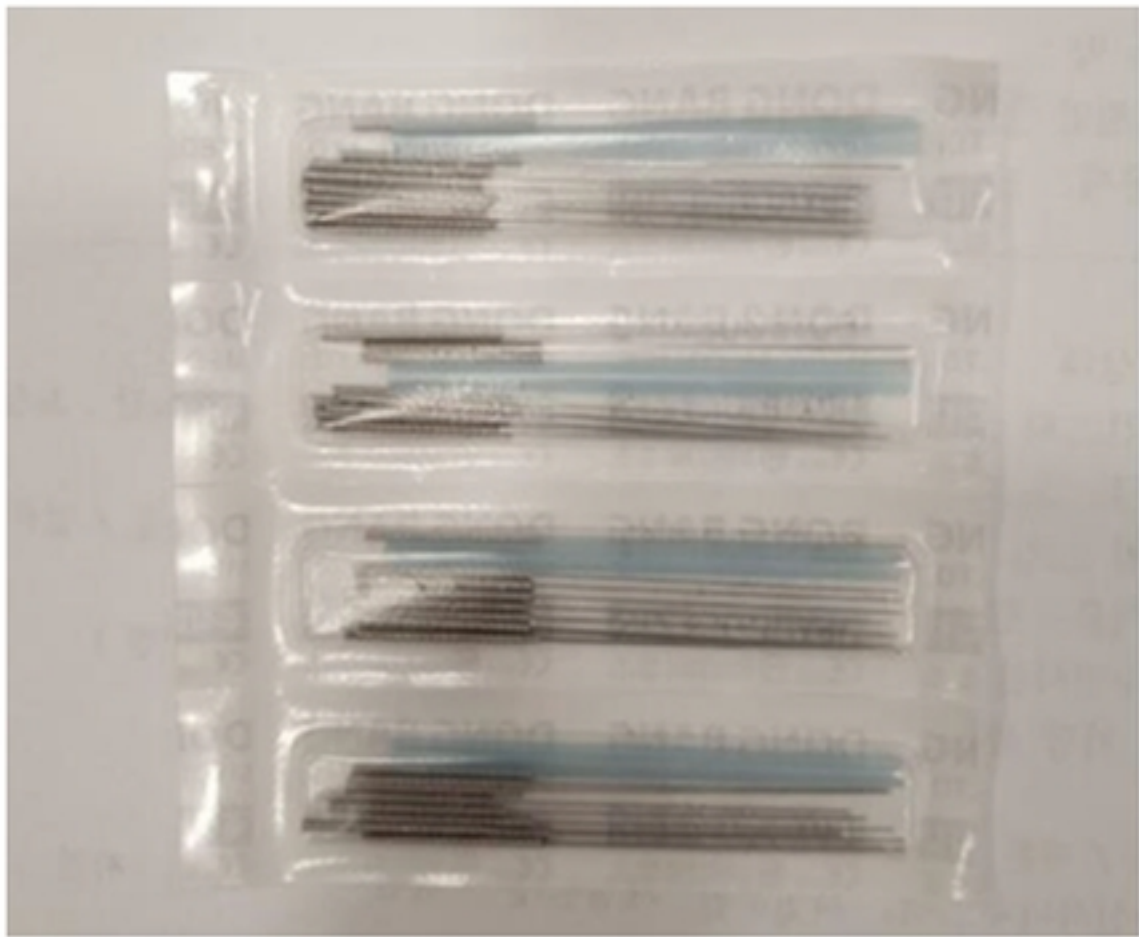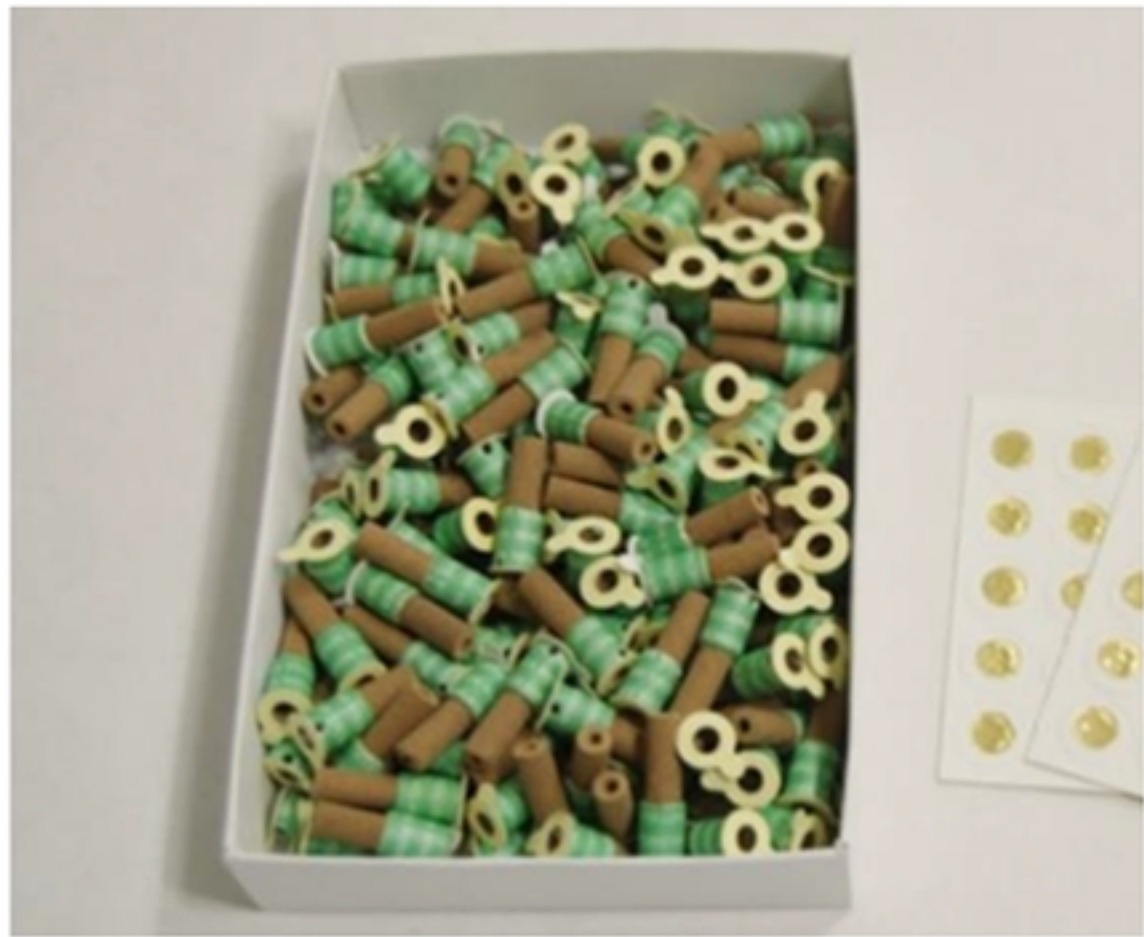

Figure
